# Supplementary material
Source: PubMed Central journal article supplement (PMC1271666)

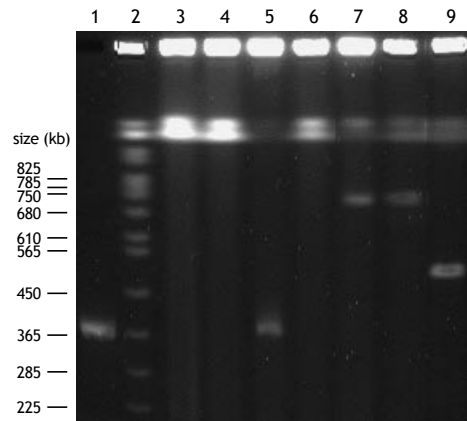

**Supplemental Figure S1 (Yamaichi and Niki)**

Supplement: 7600028s1.pdf [file 7600028s1.pdf]

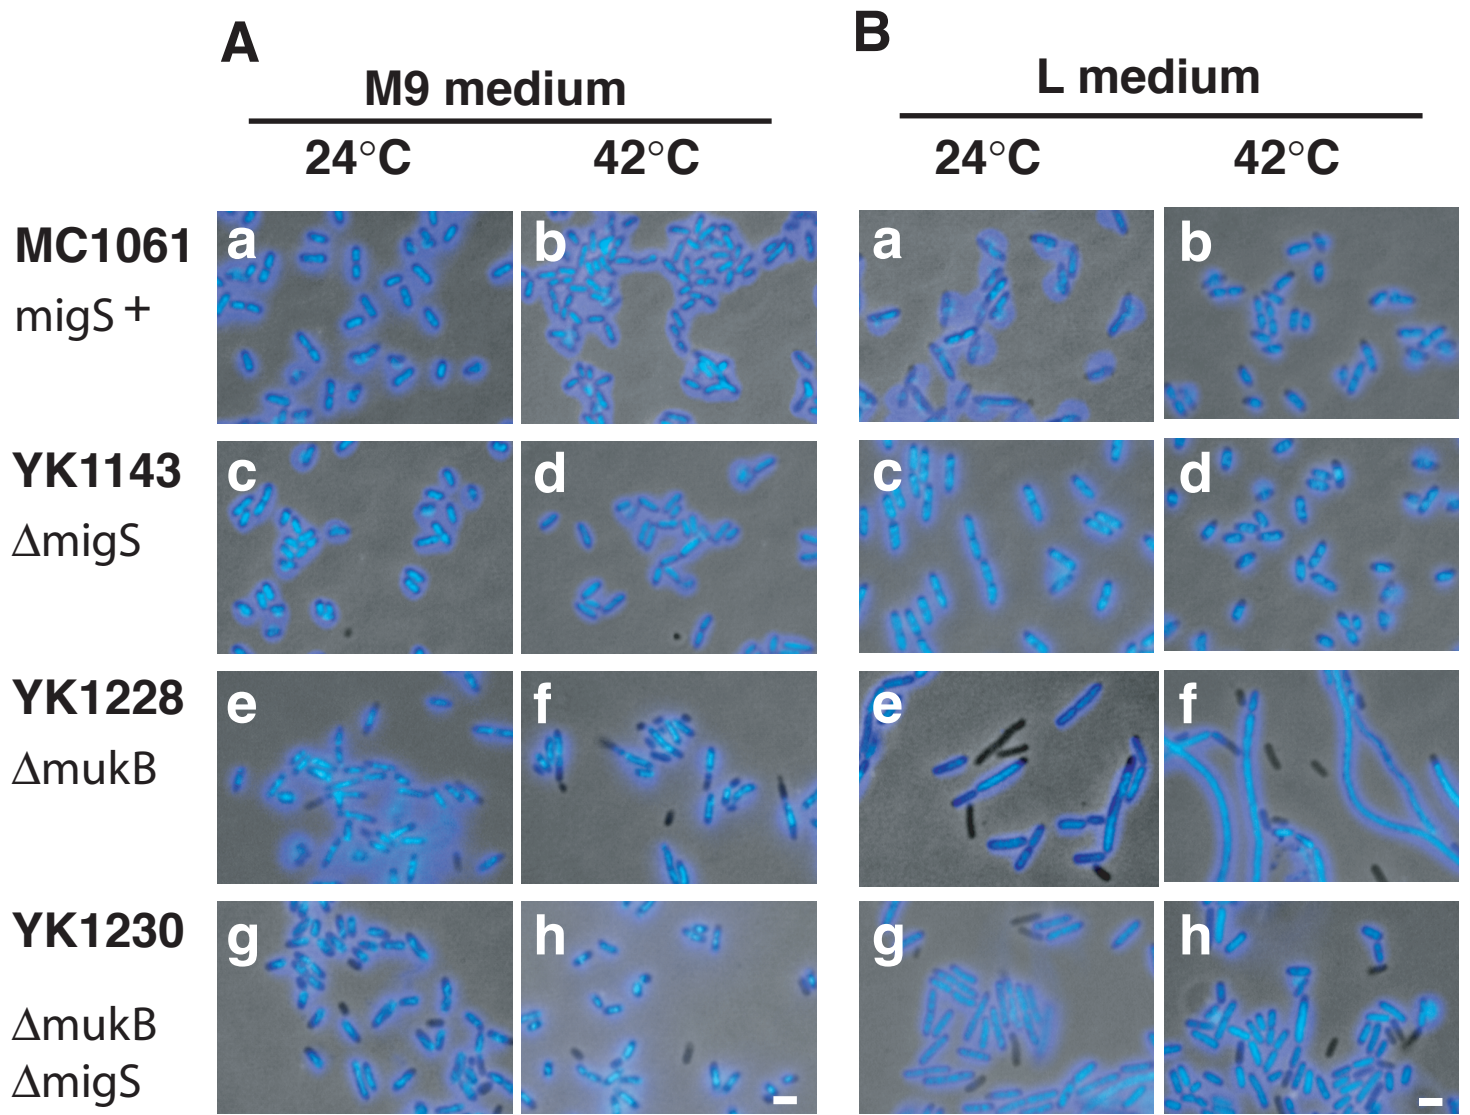

**Supplemental Figure S2 (Yamaichi and Niki)**

Supplement: 7600028s2.pdf [file 7600028s2.pdf]

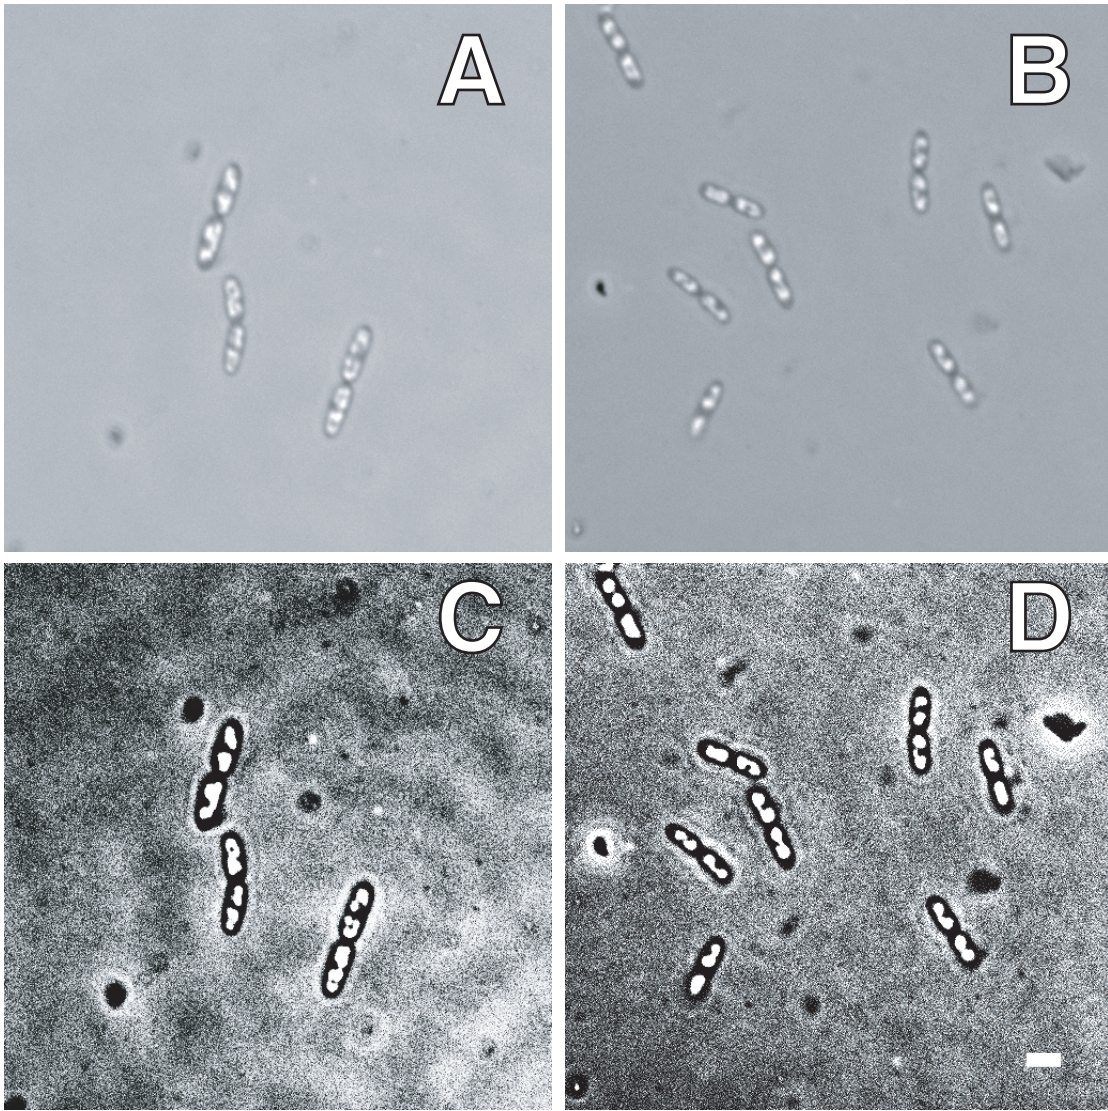

**Supplemental Figure S4 (Yamaichi and Niki)**

Supplement: 7600028s3.pdf [file 7600028s3.pdf]
